# Supplementary material for: Imine chloroboration: reaction of boron trichloride with a bulky diazadiene gives not a diazaborolium salt, but a 2,4,5-trichloro-1,3,2-diazaborolidine
Source: Royal Society of Chemistry journal article supplement (doi:10.1039/b101580j), 2001-01-01
Supplement: b101580j.doc [file b101580j.doc]

ChemComm b101580j

Electronic Supplementary Information

Experimental details and characterisation data for **1:**

A three-necked 500mL round bottomed flask was charged with dry n-hexane (150ML) and cooled to _30ºC. Solutions of 1,4-diaza-1,4-(2,6-diisopropylphenyl)-butadiene (3.76g, 10 mmol) in 20 mL n-hexane and BCl3 (10 mL of a 1M hexane solution, 10 mmol) were concurrently added dropwise to the flask. The resulting mixture was stirred for 1 hour at _30ºC before being allowed to reach ambient temperature. Yellow-orange microcrystals were filtered under argon, washed with hexane and vacuum dried to give **1a** (1.907g, 38.6 %). IR (KBr plates, nujol mull): 1589 cm-1, C=N *str*.; mp 150–152 °C (dec. with gas evolution); H (300 MHz CDCl3) 1.116 (d, 6.8Hz, 6H), 1.121 (d, 6.8Hz, 6H), 1.164 (d, 6.8Hz, 6H), 1.185 (d, 6.8Hz, 6H), *Me*A-D; 2.795 (sept., 6.8Hz, 2H) MeAC*H*MeB; 2.90 (sept., 6.8Hz, 2H) MeCC*H*MeD; 6.163 (s, 2H) ClC*H*; 7.155 (d, 8.2Hz, 2H), 7.266 (d, 7.5Hz, 2H) 7.155 (apparent t, 7.9Hz, 2H), aryl CH. 11B (64.2 MHz CDCl3) 6.8 (s). Satisfactory C, H, N and Cl analyses were obtained.

The filtrate was refrigerated to produce colourless crystals of **1b** (1.734g, 35.1%). Microanalysis and NMR in CDCl3 identical to **1a**, but IR showed no C=N *str.*
